# Supplementary material for: Ni/Ni3C core–shell nanoparticles encapsulated in N-doped bamboo-like carbon nanotubes towards efficient overall water splitting
Source: Royal Society of Chemistry journal article supplement (doi:10.1039/c8qi01335g), 2019-01-01
Supplement: c8qi01335g1.pdf [file c8qi01335g1.pdf]

**Supplementary Information**

**Ni/Ni<sub>3</sub>C core-shell nanoparticles encapsulated in N-doped bamboo-like carbon nanotubes towards efficient overall water splitting**

Tao Dong,<sup>a</sup> Xiao Zhang,<sup>b</sup> Yongqiang Cao<sup>a</sup>, Hsueh-Shih Chen<sup>c</sup> and Ping Yang<sup>a\*</sup>

<sup>a</sup> School of Material Science and Engineering, University of Jinan, Jinan 250022, P. R. China.

<sup>b</sup> Fuels and Energy Technology Institute and Department of Chemical Engineering, Curtin University, Perth WA6845, Australia.

<sup>c</sup> Department of Materials Science & Engineering, National Tsing Hua University, Hsinchu City 300, Taiwan

\*Corresponding Author has to be addressed. E-mail address: mse\_yangp@ujn.edu.cn (P. Yang)

Turn-over frequency (TOF)

We used the following formula to calculate the TOF [1]:

$$TOF = \frac{\#total\ hydrogen\ turn\ overs\ / cm^2\ of\ geometric\ area}{\#active\ sites\ / cm^2\ of\ geometric\ area}$$

The total number of hydrogen turn overs was calculated from the current density according to:

$$\begin{aligned} \# H_2 \\ = \left( j \frac{mA}{cm^2} \right) \left( \frac{1 C s^{-1}}{1000 mA} \right) \left( \frac{1 mol e^-}{96458.3 C} \right) \left( \frac{1 mol H_2}{2 mol e^-} \right) \left( \frac{6.022 \times 10^{23} H_2\ molecules}{1 mol H_2} \right) \\ per \frac{mA}{cm^2} \end{aligned}$$

The active site per real surface area is calculated from the following formula:

The molar volume of Ni:

$$V_m = \frac{F_w}{\rho} = \frac{58.69 g/mol}{8.9 g/cm^3} = 6.594 \frac{cm^3}{mol_{Ni}}$$

The average surface occupancy:

$$\begin{aligned} Active \quad \quad \quad site \quad \quad \quad number \quad \quad \quad of \quad \quad \quad Ni \\ = \left( \frac{1\ atoms/formula\ unit}{6.594\ cm^3/mol_{Ni}} \right)^{2/3} = 2.03 \times 10^{15} \text{ surface atoms} / cm^2 \\ \frac{6.022 \times 10^{23} mol^{-1}}{6.022 \times 10^{23} mol^{-1}} \end{aligned}$$

The molar volume of Ni<sub>3</sub>C:

$$V_m = \frac{F_w}{\rho} = \frac{188.4 g/mol}{7.85 g/cm^3} = 23.698 \frac{cm^3}{mol_{Ni_3C}}$$

The average surface occupancy:

$$\begin{aligned} Active \quad \quad \quad site \quad \quad \quad number \quad \quad \quad of \quad \quad \quad Ni_3C \\ = \left( \frac{3\ atoms/formula\ unit}{23.698\ cm^3/mol_{Ni_3C}} \right)^{2/3} = 1.8 \times 10^{15} \text{ surface atoms} / cm^2 \\ \frac{6.022 \times 10^{23} mol^{-1}}{6.022 \times 10^{23} mol^{-1}} \end{aligned}$$

We estimate the number of active sites as the number of surface sites from the average value of Ni and Ni<sub>3</sub>C.

$$Active\ site\ number = 1.915 \times 10^{15} \text{ surface atoms} / cm^2$$

TOF can be calculated according to:

$$TOF = \frac{(3.12 \times 10^{15} \frac{H_2/s}{cm^2} \text{ per } \frac{mA}{cm^2}) \times |j|}{\#active\ sites \times A_{ECSA}}$$

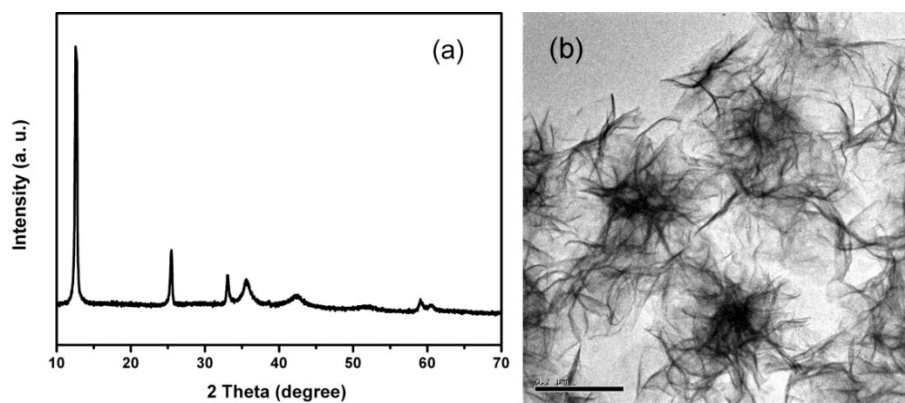

Fig. S1 (a) XRD pattern and (b) TEM image of sample Ni(OH)<sub>2</sub>.

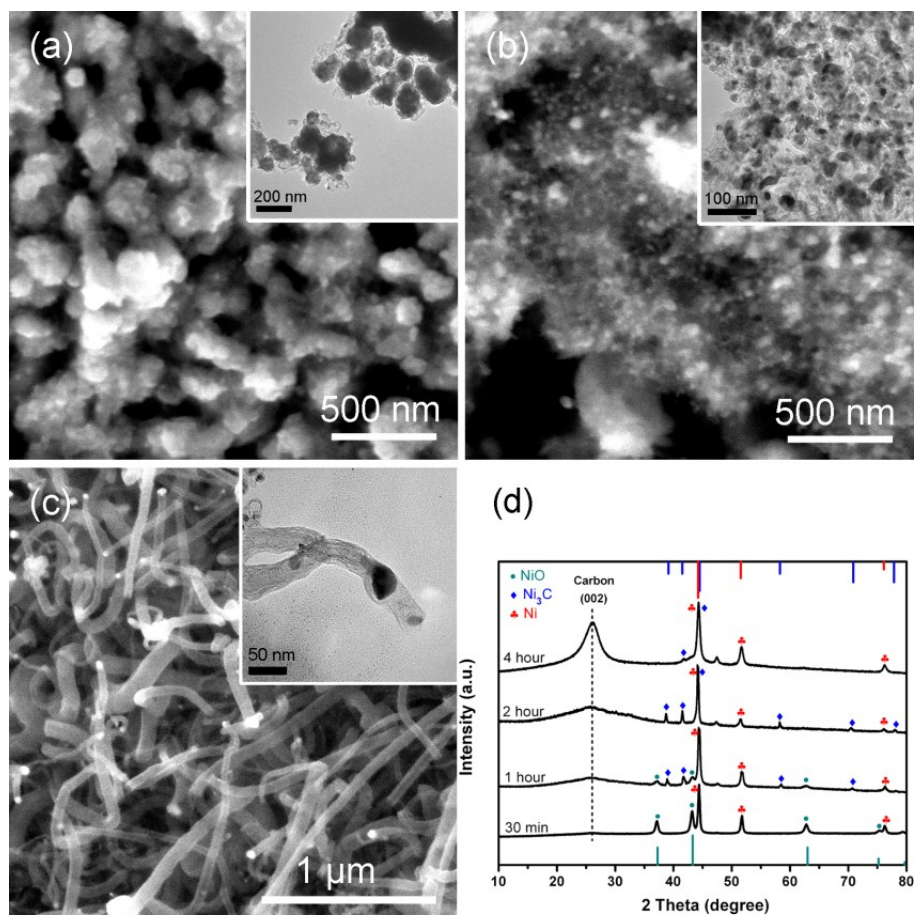

Fig. S2 SEM and TEM images of samples prepared by different annealing time: (a) 0.5h, (b) 1h, (c) 4h. (d) XRD patterns of samples prepared by different annealing time.

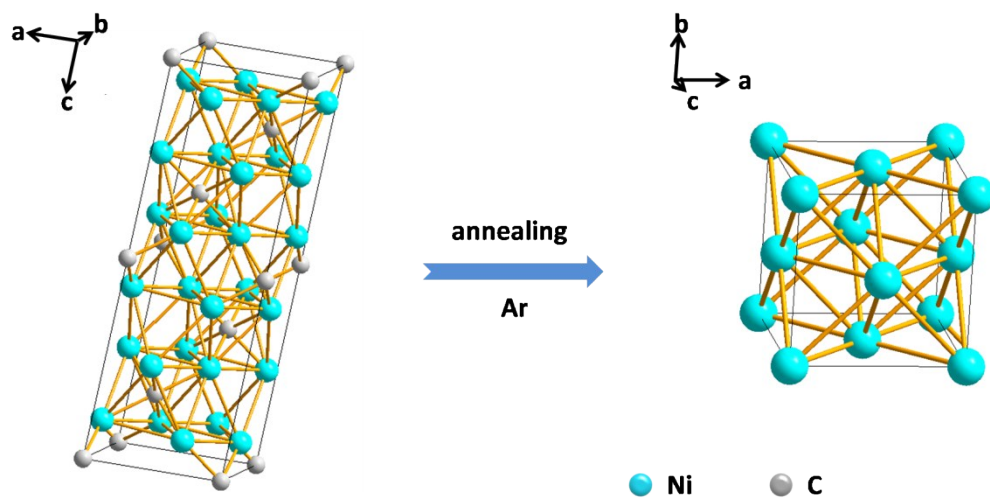

Fig. S3 Crystal structure models of trigonal  $\text{Ni}_3\text{C}$  and cubic Ni, and their phase transformation by annealing.

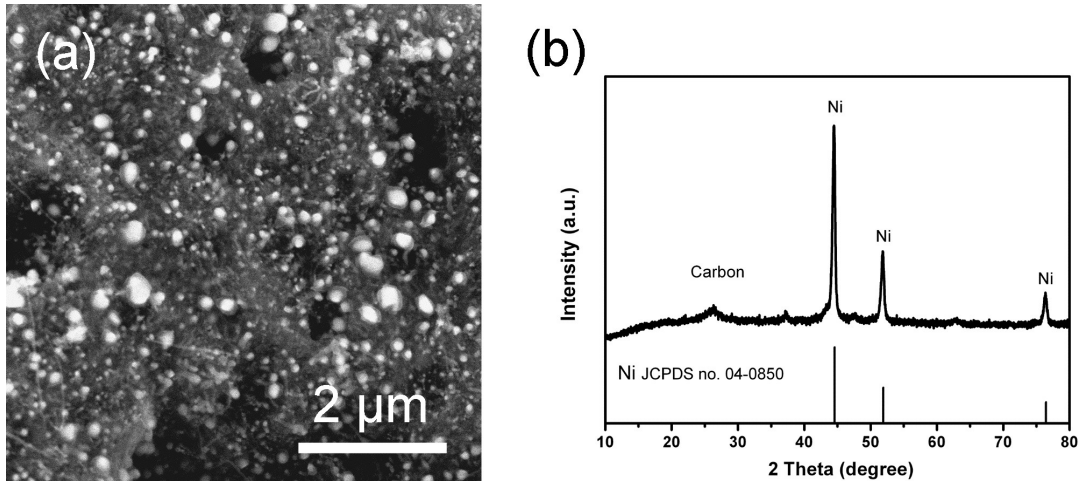

Fig. S4 (a) SEM image and (b) XRD pattern of sample prepared with nickel nitrate and Dicyandiamide.

In detail, 30 mg of  $\text{Ni}(\text{NO}_3)_2 \cdot 6\text{H}_2\text{O}$  and 200 mg of dicyandiamide were ground in a mortar with ethanol for uniform mixing. After the mixture were dried at 60  $^\circ\text{C}$ , the solid powders were placed in a covered crucible and annealed at 650  $^\circ\text{C}$  for 2 hours under an argon atmosphere, the heating rate is 5  $^\circ\text{C}/\text{min}$ .

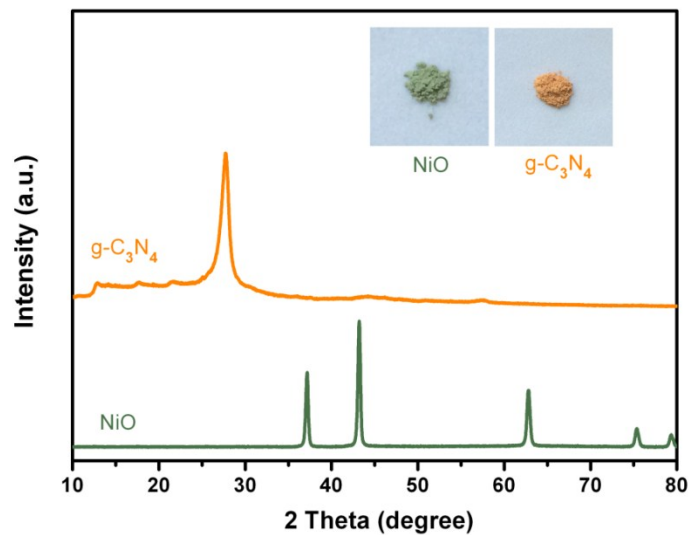

Fig. S5 XRD patterns of the products prepared by annealing of single dicyandiamide or  $\text{Ni}(\text{OH})_2$ , inserts show the photographs.

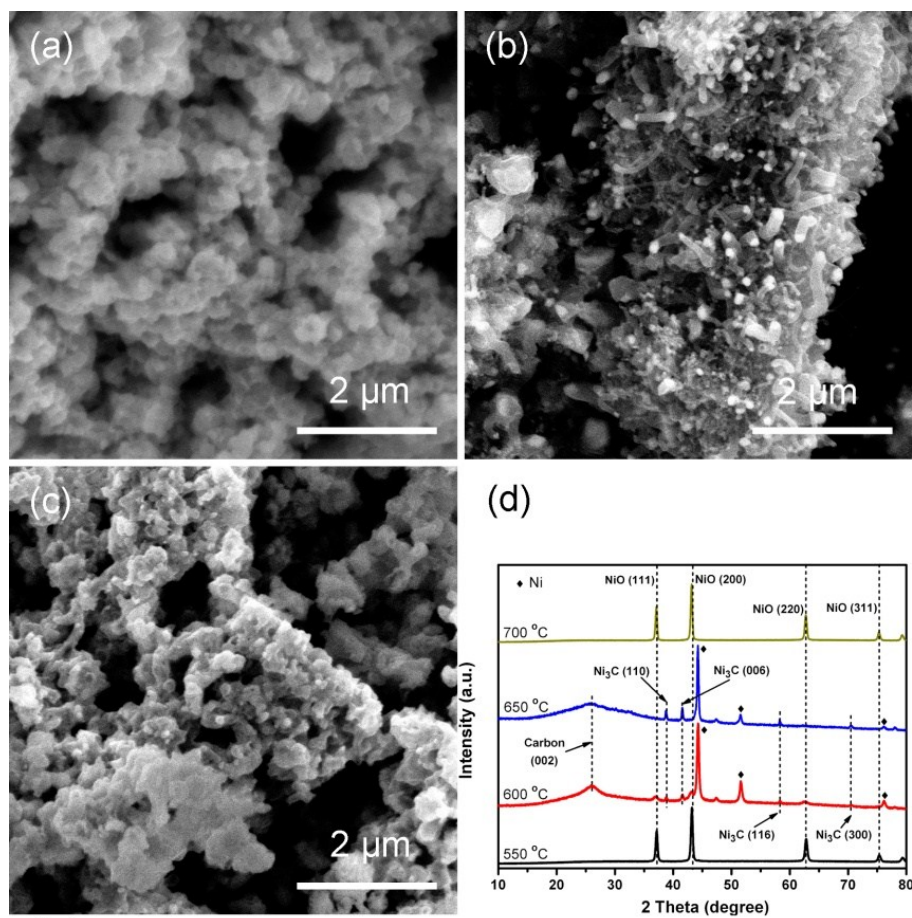

Fig. S6 SEM and TEM images of samples prepared by different annealing temperature for 2 h: (a) 550 °C, (b) 600 °C, (c) 700 °C. (d) XRD patterns samples prepared by different annealing temperature.

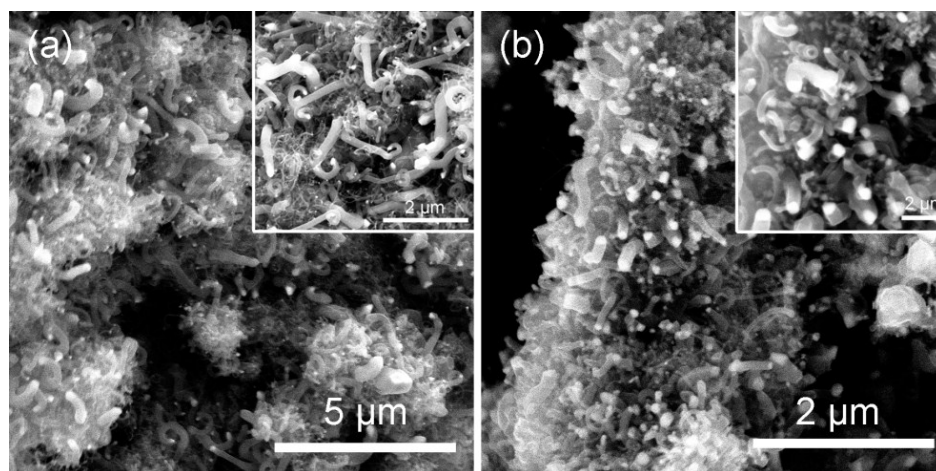

Fig. S7 SEM images of samples prepared by different amounts of dicyandiamide: (a) 100 mg, (b)

400 mg.

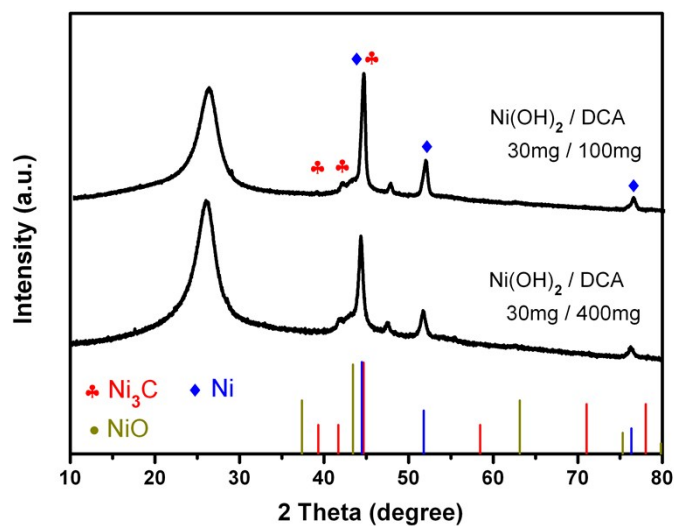

Fig. S8 XRD patterns of samples prepared by different amounts of dicyandiamide.

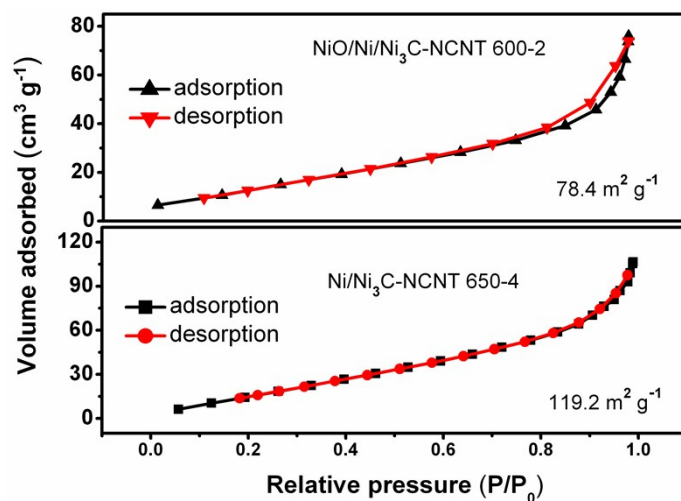

Fig. S9 N<sub>2</sub> adsorption/desorption isotherms of Ni/Ni<sub>3</sub>C-NCNT 650-4 and NiO/Ni/Ni<sub>3</sub>C-NCNT 600-2.



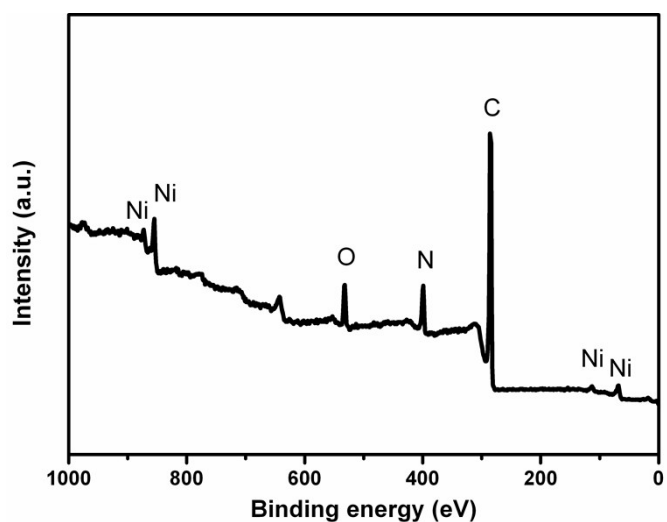

Fig. S10 XPS survey spectrum of Ni/Ni<sub>3</sub>C-NCNT 650-2.

Table S1 Percentage of different N species.

| N species      | Ni-N | Pyridinic-N | Pyrolic-N | Graphitic-N |
|----------------|------|-------------|-----------|-------------|
| Percentage (%) | 8.69 | 64.82       | 20.59     | 5.91        |

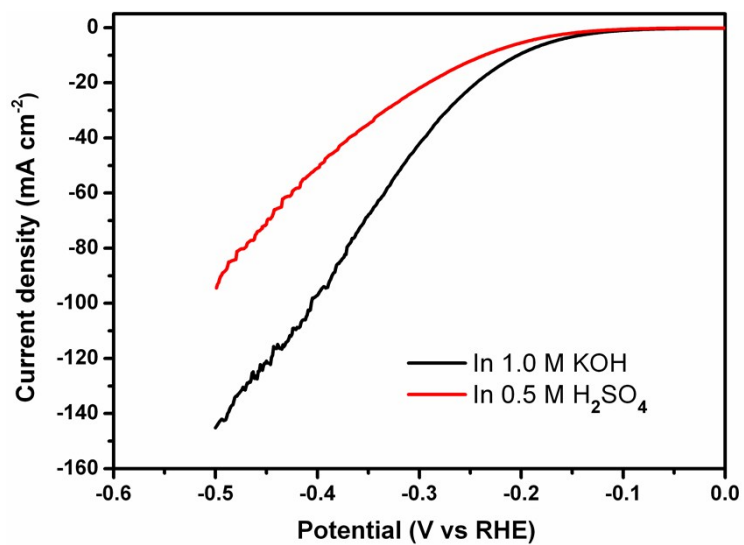

Fig. S11 LSV polarization curves of Ni/Ni<sub>3</sub>C-NCNT 650-2 for HER in acidic or alkaline solution.



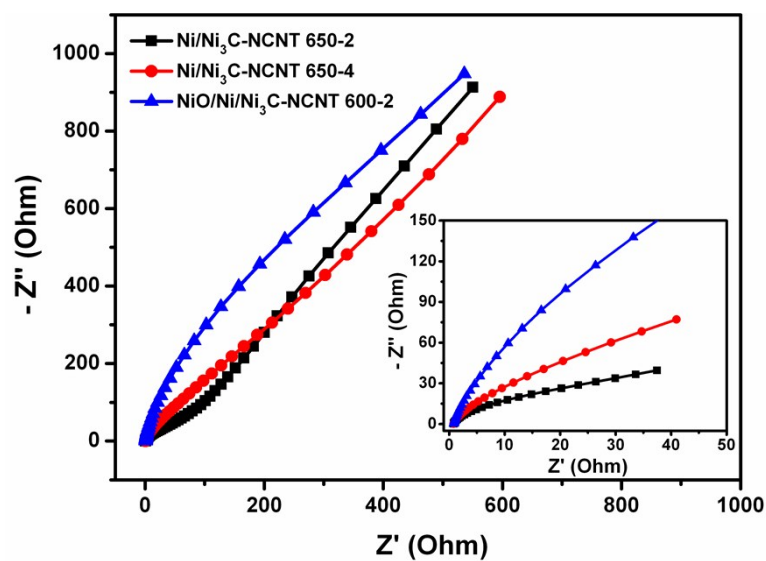

Fig. S12 EIS plots of Ni/Ni<sub>3</sub>C-NCNT 650-2, Ni/Ni<sub>3</sub>C-NCNT 650-4 and NiO/Ni/Ni<sub>3</sub>C-NCNT 600-

2.

Table S2 Comparison of HER performance of the Ni/Ni<sub>3</sub>C-NCNT 650-2 with other non-noble-metal catalysts in 1.0 M KOH solution.

| Electrocatalysts                                     | Overpotential (mV)(j=10 mA cm <sup>-2</sup> ) | Ref.      |
|------------------------------------------------------|-----------------------------------------------|-----------|
| Ni/Ni <sub>3</sub> C-NCNT 650-2                      | 204                                           | This work |
| CoO <sub>x</sub> @CN                                 | 270                                           | [2]       |
| MoS <sub>2+x</sub> /FTO                              | 310                                           | [3]       |
| CoP/CC                                               | 209                                           | [4]       |
| Ni <sub>3</sub> N                                    | 208                                           | [5]       |
| CoP/rGO-400                                          | 340                                           | [6]       |
| NiFe-LDH/NF                                          | 250                                           | [7]       |
| FeP/Fe foil                                          | 194                                           | [8]       |
| Ni <sub>5</sub> P <sub>4</sub> nanosheets on Ni foil | 150                                           | [9]       |
| Ni <sub>3</sub> S <sub>2</sub> /NF                   | 223                                           | [10]      |
| Ni <sub>3</sub> S <sub>2</sub> nanorod/NF            | 200                                           | [11]      |
| NiS/NF                                               | 158                                           | [12]      |
| NiCo <sub>2</sub> O <sub>4</sub> /NF                 | 164                                           | [13]      |

|                                  |     |      |
|----------------------------------|-----|------|
| Fe-Ni <sub>3</sub> C-2%@NCS      | 178 | [14] |
| Zn-Co-S/CFP                      | 234 | [15] |
| Ni <sub>3</sub> FeN/carbon cloth | 105 | [16] |

Table S3 Comparison of OER performance of the Ni/Ni<sub>3</sub>C-NCNT 650-2 with other non-noble-metal catalysts in 1.0 M KOH solution.

| Electrocatalysts                                         | Overpotential (mV) ( $j=10 \text{ mA cm}^{-2}$ ) | Ref.      |
|----------------------------------------------------------|--------------------------------------------------|-----------|
| Ni/Ni <sub>3</sub> C-NCNT 650-2                          | 277                                              | This work |
| N doped CNT                                              | 450                                              | [17]      |
| N-doped graphite                                         | 380                                              | [18]      |
| NiCo LDH                                                 | 367                                              | [19]      |
| CoZn-NC-700                                              | 390                                              | [20]      |
| Ni <sub>3</sub> C/C                                      | 330                                              | [21]      |
| Ni/Mo <sub>2</sub> C-PC                                  | 386                                              | [22]      |
| Fe-Ni <sub>3</sub> C-2%@NCS                              | 275                                              | [14]      |
| MoS <sub>2</sub> -Ni <sub>3</sub> S <sub>2</sub> HNRs/NF | 249                                              | [23]      |
| Co <sub>6</sub> Mo <sub>6</sub> C <sub>2</sub> /NCRGO    | 260                                              | [24]      |
| Fe-Ni oxide                                              | >375                                             | [25]      |
| NiCo <sub>2</sub> O <sub>4</sub> NNs/FTO                 | 565                                              | [26]      |
| $\beta$ -Ni(OH) <sub>2</sub>                             | 444                                              | [27]      |
| NiOOH                                                    | 525                                              | [28]      |
| NiO                                                      | >470                                             | [29]      |
| TiN@Ni <sub>3</sub> N                                    | 350                                              | [30]      |

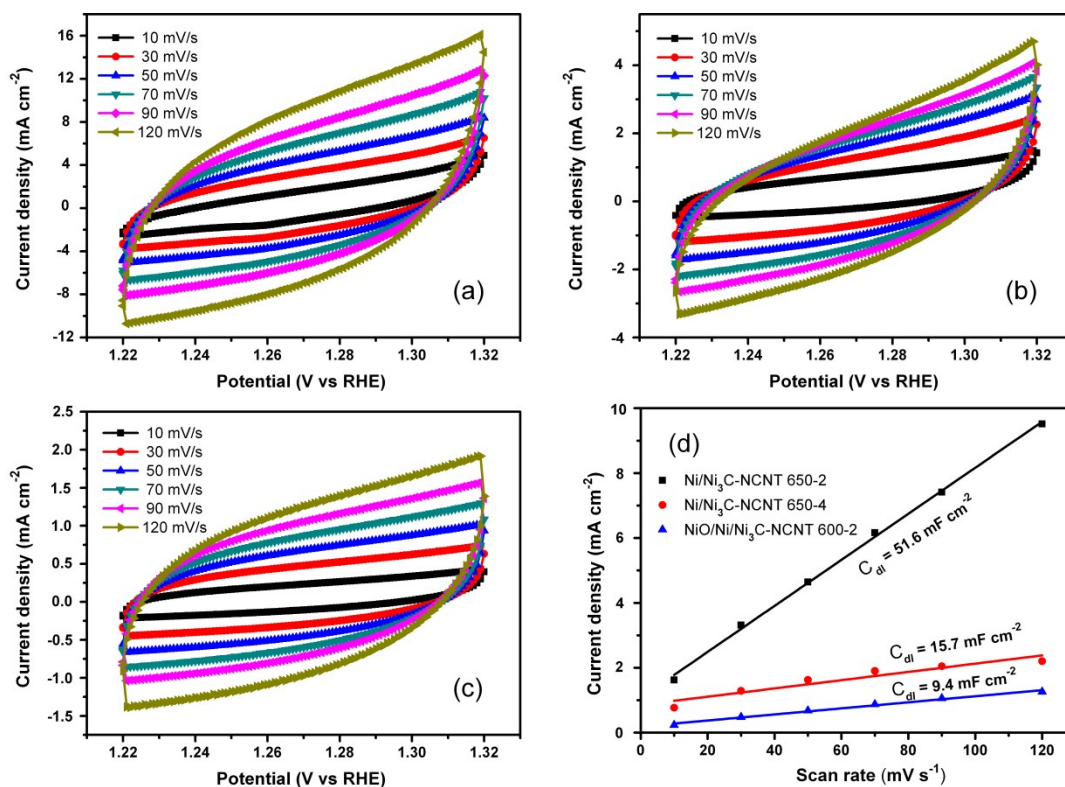

Fig. S13 CV curves of catalysts at various scan rates in the region of 1.22-1.32 V vs RHE: (a) Ni/Ni<sub>3</sub>C-NCNT 650-2, (b) Ni/Ni<sub>3</sub>C-NCNT 650-4, (c) NiO/Ni/Ni<sub>3</sub>C-NCNT 600-2. (d) Estimation of C<sub>dl</sub> by plotting the current density differences ( $\Delta j = j_a - j_c$ ) at 1.27 V with various scan rates.

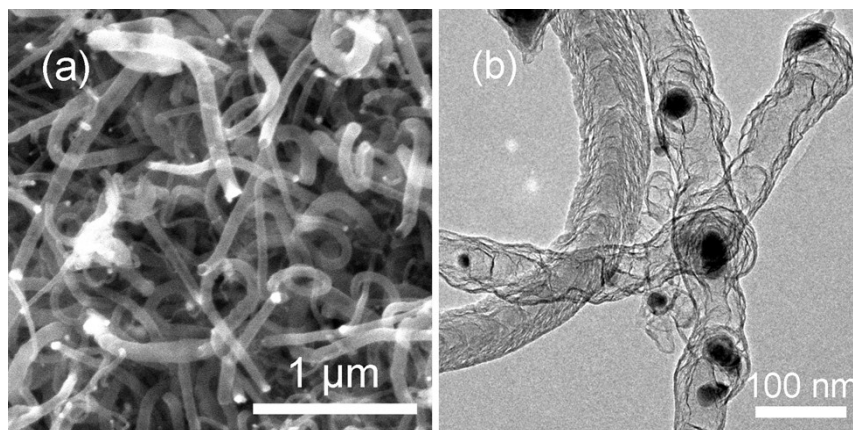

Fig. S14 (a) SEM and (b) TEM images of Ni/Ni<sub>3</sub>C-NCNT 650-2 after continuous HER test.

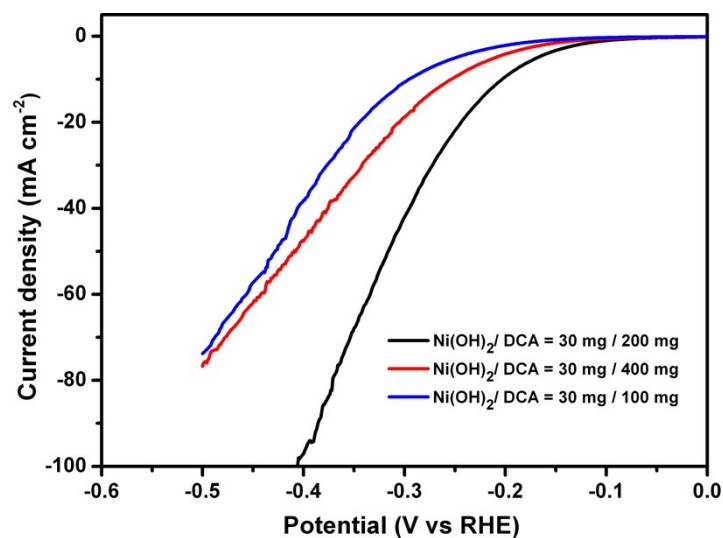

Fig. S15 LSV polarization curves of various catalysts obtained with different amount of dicyandiamide for HER test.

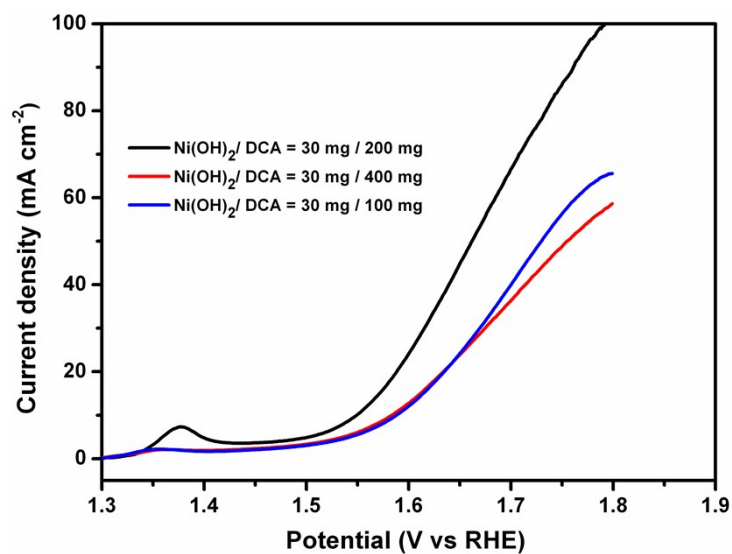

Fig. S16 LSV polarization curves of various catalysts obtained with different amount of dicyandiamide for OER test.

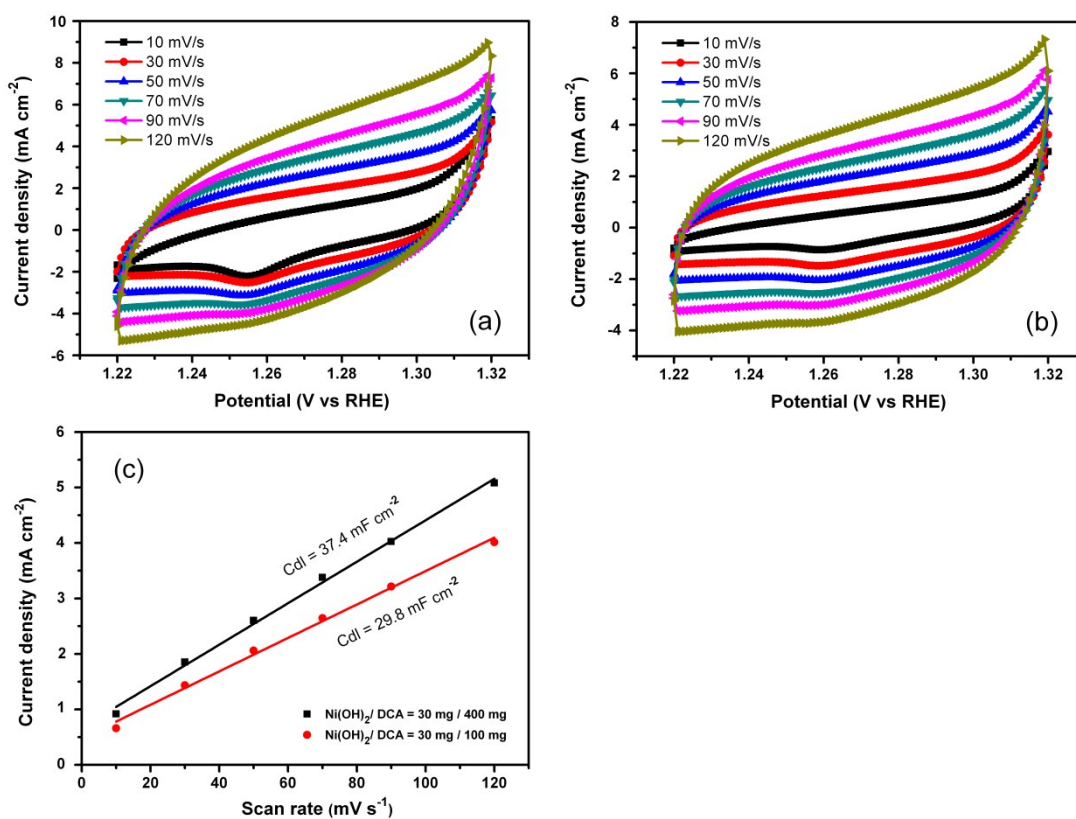

Fig. S17 CV curves of catalysts obtained with different amount of dicyandiamide at various scan rates in the region of 1.22-1.32 V vs RHE: (a) 400mg, (b) 100mg. (c) Estimation of  $C_{dl}$  by plotting the current density differences ( $\Delta j = j_a - j_c$ ) at 1.27 V with various scan rates.

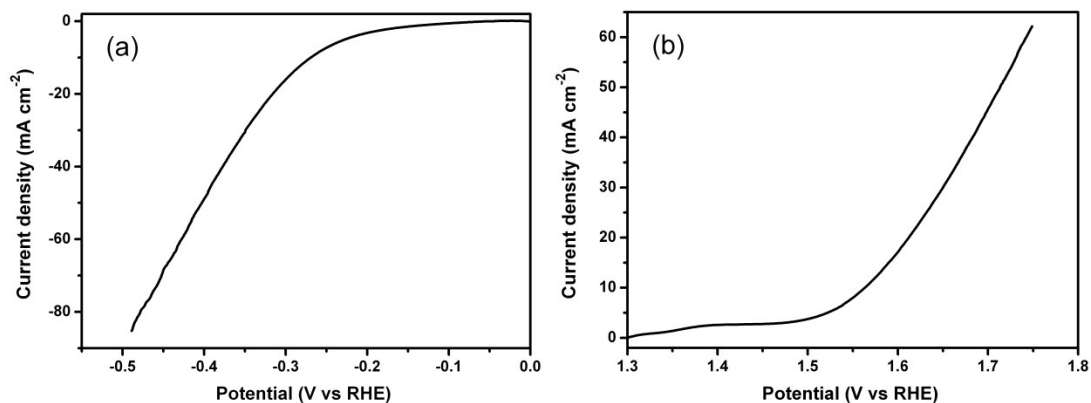

Fig. S18 LSV curves of the product prepared by Nickel nitrate and Dicyandiamide (a) HER and (b) OER.

The overpotentials are 269 mV and 330 mV to reach current density of  $10 \text{ mA cm}^{-2}$  for HER and OER, respectively.

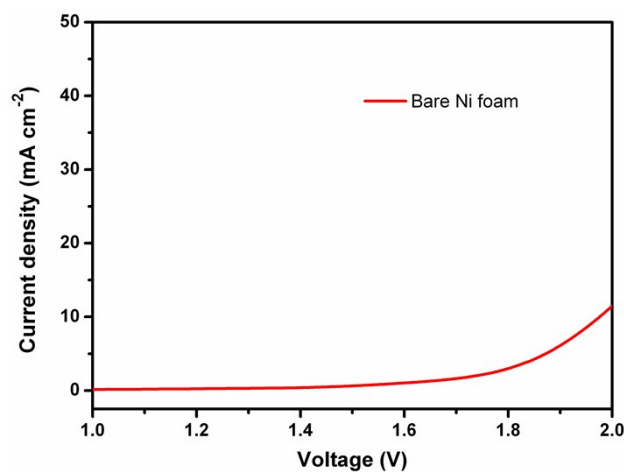

Fig. S19 LSV polarization curve of bare Nickel foam for overall water splitting.

Table S4 Comparison of the overall water splitting performance of the Ni/Ni<sub>3</sub>C-NCNT 650-2 with other non-noble-metal catalysts in 1.0 M KOH solution.

| Electrocatalysts                          | Potential (V) ( $j=10 \text{ mA cm}^{-2}$ ) | Ref.      |
|-------------------------------------------|---------------------------------------------|-----------|
| Ni/Ni <sub>3</sub> C-NCNT 650-2           | 1.65                                        | This work |
| NiFe/NiCo <sub>2</sub> O <sub>4</sub> /NF | 1.67                                        | [14]      |
| Ni <sub>3</sub> Se <sub>2</sub>           | 1.64                                        | [31]      |
| PO-Ni/Ni-N-CNFs                           | 1.69                                        | [32]      |
| NiFe HNSs                                 | 1.70                                        | [33]      |
| NiCo <sub>2</sub> O <sub>4</sub> NW       | 1.63                                        | [34]      |
| NiCo <sub>2</sub> O <sub>4</sub>          | 1.65                                        | [35]      |

|                                                                     |      |      |
|---------------------------------------------------------------------|------|------|
| Ni <sub>11</sub> (HPO <sub>3</sub> ) <sub>8</sub> (OH) <sub>6</sub> | 1.65 | [36] |
| Co <sub>24</sub> Ni <sub>1</sub> B <sub>75</sub> @NF                | 1.72 | [37] |
| Ni <sub>5</sub> P <sub>4</sub>                                      | 1.70 | [9]  |
| Ni <sub>3</sub> S <sub>2</sub>                                      | 1.76 | [10] |
| NiS                                                                 | 1.64 | [12] |

---

## References

- [1] X. Xiao, D. Huang, Y. Fu, M. Wen, X. Jiang, X. Lv, M. Li, L. Gao, S. Liu, M. Wang, C. Zhao, and Y. Shen, *ACS Appl. Mater. Interfaces*, 2018, **10**, 4689–4696.
- [2] H. Jin, J. Wang, D. Su, Z. Wei, Z. Pang and Y. Wang, *J. Am. Chem. Soc.*, 2015, **137**, 2688–2694.
- [3] C. G. Morales-Guio, L. Liardet, M. T. Mayer, S. D. Tilley, M. Grätzel and X. Hu, *Angew. Chem. Int. Ed.*, 2015, **54**, 664–667.
- [4] J. Tian, Q. Liu, A. M. Asiri and X. Sun, *J. Am. Chem. Soc.*, 2014, **136**, 7587–7590.
- [5] Y. Zhang, B. Yang, J. Xu, S. Chen, R. S. Rawat and H. Fan, *Adv. Energy Mater.*, 2016, **6**, 1600221.
- [6] L. Jiao, Y. X. Zhou and H. L. Jiang, *Chem. Sci.*, 2016, **7**, 1690–1695.
- [7] J. Luo, J. H. Im, M. T. Mayer, M. Schreier, M. K. Nazeeruddin, N. G. Park, S. D. Tilley, H. J. Fan and M. Grätzel, *Science*, 2014, **345**, 1593–1596.
- [8] C. Y. Son, I. H. Kwak, Y. R. Lim and J. Park, *Chem. Commun.*, 2016, **52**, 2819–2822.
- [9] M. Ledendecker, S. K. Calderín, C. Papp, H. P. Steinrück, M. Antonietti and M. Shalom, *Angew. Chem. Int. Ed.*, 2015, **54**, 12361–12365.
- [10] L. L. Feng, G. Yu, Y. Wu, G. D. Li, H. Li, Y. Sun, T. Asefa, W. Chen and X. Zou, *J. Am. Chem. Soc.*, 2015, **137**, 14023–14026.
- [11] C. Ouyang, X. Wang, C. Wang, X. Zhang, J. Wu, Z. Ma, S. Dou and S. Wang, *Electrochim. Acta*, 2015, **174**, 297–301.
- [12] W. Zhu, X. Yue, W. Zhang, S. Yu, Y. Zhang, J. Wang and J. Wang, *Chem. Commun.*, 2016, **52**, 1486–1489.
- [13] C. Xiao, Y. Li, X. Lu and C. Zhao, *Adv. Funct. Mater.*, 2016, **26**, 3515–3523.
- [14] Q. Yan, H. Fan, H. Yu, Y. Zhang, Y. Zheng, Z. Dai, Y. Luo, B. Li and Y. Zong, *Angew. Chem.*, 2017, **129**, 12740–12744.
- [15] X. Xu, X. Han, X. Ma, W. Zhang, Y. Deng, C. Zhong and W. Hu, *ACS Appl. Mater.*

- Interfaces*, 2017, **9**, 12574–12583.
- [16] Z. Liu, H. Tan, J. Xin, J. Duan, X. Su, P. Hao, J. Xie, J. Zhan, J. Zhang, J. J. Wang and H. Liu, *ACS Appl. Mater. Interfaces*, 2018, **10**, 3699–3706.
- [17] R. M. Yadav, J. Wu, R. Kochandra, L. Ma, C. S. Tiwary, L. Ge, G. Ye, R. Vajtai, J. Lou and P. M. Ajayan, *ACS Appl. Mater. Interfaces*, 2015, **7**, 11991–12000.
- [18] Y. Zhao, R. Nakamura, K. Kamiya, S. Nakanishi and K. Hashimoto, *Nat. Commun.*, 2013, **4**, 2390.
- [19] H. Liang, F. Meng, M. Cabán-Acevedo, L. Li, A. Forticaux, L. Xiu, Z. Wang and S. Jin, *Nano Lett.*, 2015, **15**, 1421–1427.
- [20] B. Chen, X. He, F. Yin, H. Wang, D. J. Liu, R. Shi, J. Chen and H. Yin, *Adv. Funct. Mater.*, 2017, **27**, 1700795.
- [21] H. Wang, Y. Cao, G. Zou, Q. Yi, J. Guo and L. Gao, *ACS Appl. Mater. Interfaces*, 2017, **9**, 60–64.
- [22] Z. Y. Yu, Y. Duan, M. R. Gao, C. C. Lang, Y. R. Zheng and S. H. Yu, *Chem. Sci.*, 2017, **8**, 968–973.
- [23] Y. Yang, K. Zhang, H. Lin, X. Li, H. C. Chan, L. Yang and Q. Gao, *ACS Catal.*, 2017, **7**, 2357–2366.
- [24] Y. J. Tang, C. H. Liu, W. Huang, X. L. Wang, L. Z. Dong, S. L. Li and Y. Q. Lan, *ACS Appl. Mater. Interfaces*, 2017, **9**, 16977–16985.
- [25] J. Landon, E. Demeter, N. İnoğlu, C. Keturakis, I. E. Wachs, R. Vasić, A. I. Frenkel and J. R. Kitchin, *ACS Catal.*, 2012, **2**, 1793–1801.
- [26] H. Shi, and G. Zhao, *J. Phys. Chem. C*, 2014, **118**, 25939–25946.
- [27] M. Gao, W. Sheng, Z. Zhuang, Q. Fang, S. Gu, J. Jiang and Y. Yan, *J. Am. Chem. Soc.*, 2014, **136**, 7077–7084.
- [28] S. Klaus, Y. Cai, M. W. Louie, L. Trotochaud and A. T. Bell, *J. Phys. Chem. C*, 2015, **119**, 7243–7254.
- [29] L. Kuai, J. Geng, C. Chen, E. Kan, Y. Liu, Q. Wang and B. Geng, *Angew. Chem. Int. Ed.*, 2014, **126**, 7677–7681.
- [30] Q. Zhang, Y. Wang, Y. Wang, A. M. Al-Enizi, A. A. Elzatahry and G. J. Zheng, *Mater.*



- Chem. A*, 2016, **4**, 5713–5718.
- [31] J. Shi, J. Hu, Y. Luo, X. Sun and A. M. Asir, *Catal. Sci. Technol.*, 2015, **5**, 4954–4958.
- [32] Z. Y. Wu, W. B. Ji, B. C. Hu, H. W. Liang, X. X. Xu, Z. L. Yu, B. Y. Li and S. H. Yu, *Nano Energy*, 2018, **51**, 286–293.
- [33] X. Sun, Q. Shao, Y. Pi, J. Guo and X. Huang, *J. Mater. Chem. A*, 2017, **5**, 7769–7775.
- [34] S. Arumugam, G. Pandian and S. Sangaraju, *Adv. Funct. Mater.*, 2016, **26**, 4661–4672.
- [35] X. Gao, H. Zhang, Q. Li, X. Yu, Z. Hong, X. Zhang, C. Liang and Z. Lin, *Angew. Chem. Int. Ed.*, 2016, **55**, 6290–6294.
- [36] P. W. Menezes, C. Panda, S. Loos, F. Bunschei-Bruns, C. Walter, M. Schwarze, X. Deng, H. Dau, M. Driess, *Energy Environ. Sci.*, 2018, **11**, 1287–1298.
- [37] N. Xu, G. Cao, Z. Chen, Q. Kang, H. Dai and P. Wang, *J. Mater. Chem. A*, 2017, **5**, 12379–12384.
